1 **A generalized kinetic model describes ion-permeation mechanisms in**  
2 **various ion channels**

3

4 Di Wu<sup>a</sup>

5 *Department of Physiology and Neurobiology, School of Life Sciences, Fudan*

6 *University, Shanghai 200438, P. R. China*

7

8

9

10 <sup>a</sup>Electronic mail: [diwu@fudan.edu.cn](mailto:diwu@fudan.edu.cn)

11

12

## 13 **Abstract**

14 Ion channels conduct various ions across biological membranes to maintain the  
15 membrane potential, to transmit the electrical signals, and to elicit the subsequent  
16 cellular responses by the signaling ions. Ion channels differ in their capabilities to  
17 select and conduct ions, which can be studied by the patch-clamp recording method  
18 that compares the current traces responding to the test voltage elicited at different  
19 conditions. In these experiments, the current-voltage curves are usually fitted by a  
20 sigmoidal function containing the Boltzmann factor. This equation is quite successful  
21 in fitting the experimental data in many cases, but it also fails in several others.  
22 Regretfully, some useful information may be lost in these data, which otherwise can  
23 reveal the ion-permeation mechanisms. Here we present a generalized kinetic model  
24 that captures the essential features of the current-voltage relations and describes the  
25 simple mechanism of the ion permeation through different ion channels. We  
26 demonstrate that this model is capable to fit various types of the patch-clamp data and  
27 explain their ion-permeation mechanisms.

28

## 29        **Introduction**

30        Cell membranes, made of lipid bilayers, are impermeable to inorganic ions.  
31        Various ions cross the membrane via the specific ion channels down their electrical-  
32        chemical gradient, or against this gradient at the expense of the extra energy, e.g., via  
33        the hydrolysis of the ATP molecules. Due to the availabilities and functions of  
34        different ion channels, pumps, and transporters at different locations, the  
35        concentrations of the various ions are maintained at the different levels in specific  
36        locations separated by the cell membranes, making ions as the important signaling  
37        molecules. In these processes, the transmembrane ion channels play important roles,  
38        owing to their varied capabilities to select and conduct ions across the membrane.  
39        The dysfunction of the ion channels can lead to various diseases (Ackerman &  
40        Clapham, 1997; Ashcroft, 2006; Lehmann-Horn & Jurkat-Rott, 1999).

41        Ion channel functions are usually studied by the patch-clamp recording method  
42        (Neher & Sakmann, 1976; Neher, Sakmann, & Steinbach, 1978), where the electrical  
43        currents are recorded responding to a series of the test voltages elicited. The shapes of  
44        the current-voltage curves (typical curves are shown in Fig. 1) are helpful in  
45        elucidating the channel functions, e.g., they can provide the information such as the  
46        magnitude of the inward and outward currents indicating the inward or outward  
47        rectifications, the steepness of the current slopes, the reversal voltage, etc. To  
48        compare the functions of the wild-type and mutant channels, or to compare the same  
49        channel under the different situations, multiple curves are usually plotted together for  
50        a quick and qualitative description of the channel functions. For the quantitative  
51        comparisons, and for the explanation of the ion-permeation mechanisms, we must use  
52        a model that fits the data.

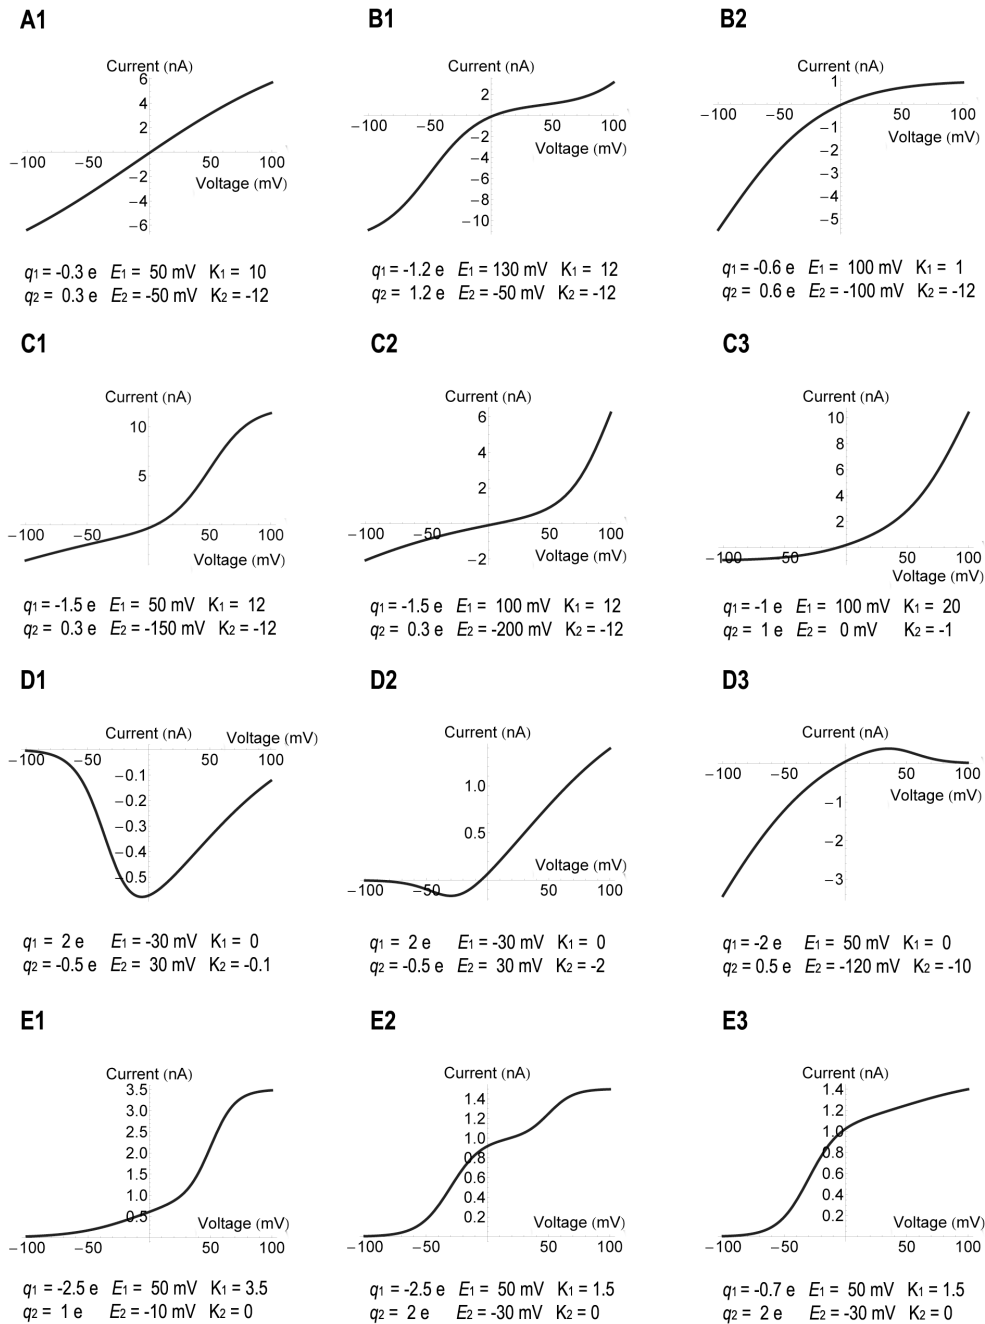

53

54 *Figure 1.*

55 *Typical current-voltage curves represented by the three-state model. Mechanism*  
 56 *m3A3 was used for curves D1 and D2, and mechanism m3A2 was used for all other*  
 57 *curves. The model parameters are listed below each curve. The current has the same*  
 58 *unit as  $E_a$ , which was set arbitrarily to 1 nA for mechanism m3A2 and -1 nA for*  
 59 *mechanism m3A3. All temperatures were set to 22 °C.*

60

61 In 1952, Hodgkin and Huxley showed that the relation of the channel open  
62 probability  $P_o$  and the test voltage  $V$  followed the sigmoidal equation containing the  
63 Boltzmann factor (Hodgkin & Huxley, 1952) which, through later analyses, led to the  
64 formula  $P_o = 1/(1+\exp(-q(V-V_{1/2})/k_B T))$ . This equation is commonly referred to as  
65 “Boltzmann equation”. Here  $q$  represents the electric charge,  $V_{1/2}$  is the half-activation  
66 potential,  $k_B$  is Boltzmann’s constant and  $T$  is the absolute temperature. This equation  
67 captures the essential features of the two-state ion permeation processes. It describes  
68 not only the channel open probability, but also the normalized current ( $I/I_{\max}$ ) as a  
69 function of the applied voltage, which has been quite successful in fitting the patch-  
70 clamp data obtained from many ion-permeation processes and are still widely used  
71 nowadays.

72 Being a two-state model, the Boltzmann equation has limitations, that it does not  
73 describe the multistage or the two-direction permeation data. To use the model, all  
74 data are converted to within the range of 0 to 1 (normally done by dividing the  
75 maximum current value). However, many data also show the negative current in  
76 addition to the positive current (curves in the first three rows of Fig. 1), and some  
77 curvatures (Fig. 1) are hardly fitted by the Boltzmann equation. Therefore, more  
78 sophisticated models are developed, helpful to solve the problems in various aspects  
79 (Bezanilla, 2018; Chowdhury & Chanda, 2011, 2012; Chowdhury, Haehnel, &  
80 Chanda, 2014; Horng, Eisenberg, Liu, & Bezanilla, 2019; Islas & Sigworth, 2001;  
81 Sigg, 2014). Lacroix et al. developed a three-state model (Lacroix et al., 2012),  
82 successfully fitting the multistage charge-voltage curves obtained from many gating-  
83 current experiments of the Shaker  $K^+$  channel (Carvalho-de-Souza & Bezanilla, 2018;  
84 Lacroix, Hyde, Campos, & Bezanilla, 2014; Lacroix et al., 2012). Bezanilla et al.

85 employed the sequential Boltzmann equations (two Boltzmann equations of different  
86 parameters added together) that fitted the gating-charge data of  $K^+$  ion permeating  
87 through the mutant Shaker channel (Bezanilla, Perozo, & Stefani, 1994). More often,  
88 the higher-rank models (usually the Markov models) with more than three-states are  
89 employed that include all possible ion-permeation pathways (Horn & Vandenberg,  
90 1984; Vandenberg & Bezanilla, 1991; Zagotta, Hoshi, & Aldrich, 1994; Zagotta,  
91 Hoshi, Dittman, & Aldrich, 1994). These Markov models are very helpful to elucidate  
92 the allosteric ion permeation mechanisms. Although useful, these models are usually  
93 complicated containing multiple steps, and different permeation processes may  
94 employ different models, making the predicted parameters unsuitable for comparison  
95 among channels.

96 Therefore, a universal model is needed, not only to fit the data but also to explain  
97 the ion-permeation mechanism and compare the functions of different channels. Here  
98 we develop a generalized kinetic model. When employing three states, it is able to fit  
99 the commonly occurred current-voltage curves (typical curves are shown in Fig. 1)  
100 obtained from the patch-clamp experiments, and explain their mechanisms. The  
101 model is especially helpful to study the two-direction permeation data, which are  
102 usually left unfitted. We call this model a generalized model, because it can include  
103 other models that are commonly used nowadays. For example, when employing two  
104 states, it includes the Boltzmann equation; when employing three states, it includes  
105 the existing three-state model. In addition, this model can include the individual  
106 mechanisms suitable for each experimental design. With it, we can easily compare the  
107 functions of the different channels or the same channel under the different conditions  
108 simply by comparing the model parameters. We demonstrate the applicability of this  
109 model using several published patch-clamp data.

110

## 111 **Theory and Results**

112 Transmembrane ion channels usually contain the gating and the selectivity filter  
113 domains, and some contain the extra domains sensing the change of the agonist  
114 concentrations or the environmental stimuli, such as the membrane voltage, pH,  
115 temperature, pressure, etc. Many physiological studies find that the channel can  
116 remain in the closed state (C) when its gate is closed that prohibits ion permeation, or  
117 enter the open state (O) when the gate is open that allows the binding and  
118 transmission of ions. Therefore, the open and closed states are often used in the two-  
119 state model:  $C \leftrightarrow O$ , as was used in deriving the Boltzmann equation (Hodgkin &  
120 Huxley, 1952).

121 However, ion permeation through channels can involve more than two states.  
122 Indeed, many studies find that the channel can enter the inactivation state as well. For  
123 example, the voltage-gated  $K^+$  channel can enter the inactivation state during the  
124 sustained depolarization stimulus (Choi, Aldrich, & Yellen, 1991; Hoshi, Zagotta, &  
125 Aldrich, 1991). The structural studies even revealed the distinct features of the ion-  
126 channel complex presumably representing the slow inactivation state, e.g., the  
127 collapsed conformation of the selectivity filter of the KcsA potassium channel  
128 (Cuello, Jogini, Cortes, & Perozo, 2010; Y. F. Zhou, Morais-Cabral, Kaufman, &  
129 MacKinnon, 2001), the lack of the ion occupation at the S1 binding site in the  
130 selectivity filter of the Kv1.2 potassium channel (Pau, Zhou, Ramu, Xu, & Lu, 2017)  
131 with an overall structure perturbed less even in the lipid bilayer environment  
132 (Matthies et al., 2018), etc. And many studies suggest that the selectivity filter can be  
133 the second gate that modulates the channel inactivation (Cordero-Morales et al., 2006;  
134 Liu, Jurman, & Yellen, 1996). Therefore, the inactivation state (I) is commonly

135 employed in describing the ion-permeation mechanisms in three-state models, which

136 can be expressed in several ways:  $C \rightarrow O \rightarrow I$ ,  $\begin{array}{c} C \leftrightarrow O \\ \swarrow \quad \searrow \\ I \end{array}$ , etc. However, in addition to

137 the inactivation state, the three-state model may also employ the intermediate ion-

138 binding state ( $O_i$ ) when the ion-binding process contains multiple steps or via the

139 multiple subunits (such as when studying the gating charge permeating through the

140 four voltage-sensing subunits of a voltage-gated ion channel) (Lacroix et al., 2014;

141 Lacroix et al., 2012). In these cases, the three-state model can be expressed as

142  $C \rightarrow O_i \rightarrow O$  or some other similar formulas. Hence the three-state model contains

143 certainly more than one mechanism, which seems to complicate the model building

144 procedure. Here we try to find a universal model that encompasses all these

145 mechanisms, so that one working equation is enough to handle all types of the ion-

146 permeation data. Aimed at deriving a universal model, we no longer use the symbols

147  $C$ ,  $I$ ,  $O_i$ , and  $O$  in our analyses, instead, we use the general symbols like those often

148 used in the kinetic models describing an enzymatic reaction, and denote only the ion-

149 unbound states ( $E$  and  $F$  representing the different states of an apo channel, see

150 captions of Figs. 2-3 for descriptions) and the ion-bound states ( $ES$ ,  $FT$ , and  $EST$

151 representing the channels of state  $E$  or  $F$  binding ions  $S$  or  $T$ , see captions of Figs. 2-3

152 for descriptions) in our model. This is because any of these states can have multiple

153 meanings suitable for the specific situation, e.g., the  $ES$  state can represent the active

154 channel state  $O$ , or the intermediate ion-binding state  $O_i$ , or the inactivation state  $I$ ,

155 depending on the different situations. This enables us to write the general equation for

156 the three-state model.



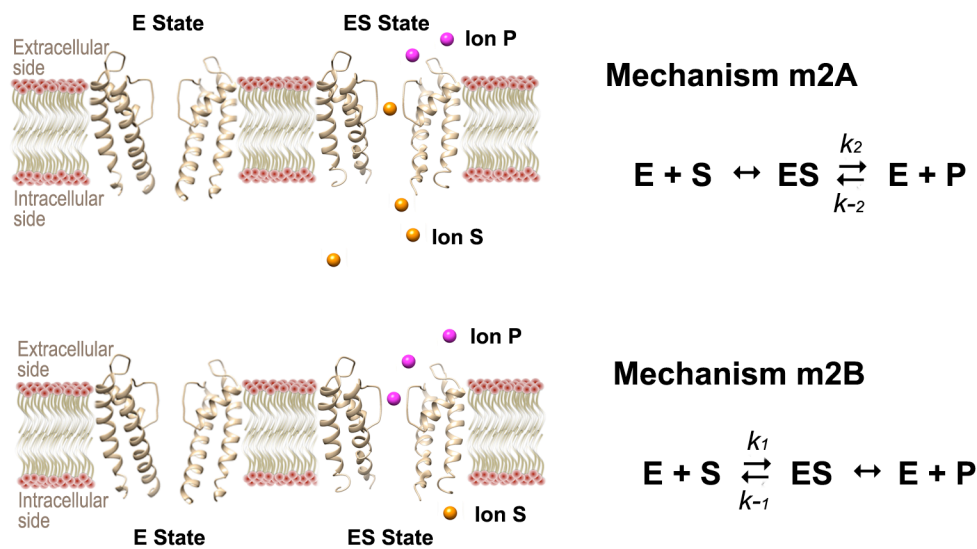

157

158 *Figure 2.*

159 *Mechanisms of the two-state model. The schematic pictures show the E- and ES-state*  
 160 *channels embedded in the lipid bilayer. The apo channel is denoted as E, and the ion-*  
 161 *bound form is denoted as ES. Note that the E state can also have ions bound on it (see*  
 162 *text). The crystal structures of the KcsA K<sup>+</sup> channel were used to represent the E*  
 163 *(PDB 3FB6) and ES (PDB 3FB7) states. The substrate ion S, located at the*  
 164 *intracellular side, changes the symbol to P (the product ion) after transmitted to the*  
 165 *extracellular side and vice versa. The enzymatic reactions are written beside each*  
 166 *schematic picture, describing each process involving two steps: the ion-binding and*  
 167 *the subsequent ion-permeation step. The ion-binding step is at equilibrium whenever*  
 168 *a double-direction arrow (↔) shows up. The outward rate constant is written above*  
 169 *the right arrow and the inward rate constant is written below the left arrow for each*  
 170 *ion-permeation step.*

171



179 *side. For clarity, we always use the different symbols S and T to describe the*  
180 *mechanism, although they may represent the same type of ion in reality. The ion-*  
181 *bound state (ES or FT) can have several meanings, representing such as the active*  
182 *channel state, the partial-active or the intermediate state, the active state with the*  
183 *enhanced conductivity, the inactivation state, etc. But these representations are not*  
184 *shown in the schematic picture. Below the picture, four mechanisms of group A are*  
185 *listed, each composed of a pair of equations describing the ion-binding and the*  
186 *subsequent ion-permeation processes. The equilibrium binding step and the relevant*  
187 *rate constants are described similarly as those in Fig. 2. The four mechanisms differ*  
188 *in the ion-permeation directions. Mechanisms in group B employ two ion-unbound*  
189 *states E and F (PDB 3FB5), and one ion-bound state ES, and mechanisms in group C*  
190 *employ one ion-unbound state E and two ion-bound states ES and EST (PDB 3FB7),*  
191 *where the EST state has two ions S and T bound on it. The associated mechanisms are*  
192 *written below each picture. Note that the F and EST states can also have several*  
193 *meanings, some overlapping those represented by the ES or FT state, but we do not*  
194 *show their multiple meanings in this figure.*

195

196 The next question is whether the three-state model is enough to handle all types  
197 of the patch-clamp data? This depends on the experimental design and on the shapes  
198 of the current-voltage curves obtained. In the normal patch-clamp experiments, the  
199 currents are recorded responding to the specified voltage elicited. These recordings do  
200 not distinguish the transition of states not involving the change of currents, such as the  
201 transitions among several closed states from  $C_1 \rightarrow C_2 \rightarrow C_3$ , etc. Unless the special  
202 experimental designs are employed that can incur current changes from these states,  
203 they have to be combined into one closed state due to the lack of information.

204 Similarly, if the transitions among several inactivation states do not incur current  
205 changes, they need be combined as well. Although the model can contain multiple  
206 open states, whether to employ all these states depends on the shape of the current-  
207 voltage curve. We suggest starting the fitting procedure with the lower-rank model  
208 whenever possible unless otherwise required by the specific experimental design. This  
209 is because several parallel or sequential steps can be combined into one step if they do  
210 not incur the appreciable current changes. For example, if the events of ion-  
211 permeation through different subunits (representing the different states) occur  
212 simultaneously that each individual state cannot be differentiated by the current curve,  
213 these states can be combined as one state. The sequential ion-binding processes  $E + S$   
214  $\rightarrow ES$  and  $ES + S \rightarrow ES_2$  are readily combined into one ion-binding process  $E + 2S$   
215  $\rightarrow ES_2$  when the data obtained is not sufficient to differentiate the ES state.

216 Following these ideas, we find that the three-state model is enough to describe  
217 the commonly occurred current-voltage curves shown in Fig. 1. Therefore, we focus  
218 on explaining the two- and three-state models in this paper.

### 219 **A. The two-state model**

220 Two mechanisms exist because the channel can conduct ions in two directions,  
221 albeit with different abilities. Here we follow the Michaelis-Menten mechanism and  
222 use the equilibrium approximation analysis. In the first mechanism (m2A in Fig. 2),  
223 the ion binding at the intracellular side is in equilibrium relative to the outward  
224 conduction step, so that  $k_2 \ll k_{-1}$  and  $k_{-2}[P] \ll k_1[S]$ . And in the second mechanism  
225 (m2B in Fig. 2) the ion binding at the extracellular side is in equilibrium relative to  
226 the inward conduction step ( $k_2 \gg k_{-1}$  and  $k_{-2}[P] \gg k_1[S]$ ). Here we use brackets to  
227 denote the concentrations of each species, e.g., [S] and [P] represent the  
228 concentrations of the substrate ion and the product ion at the intracellular and the

229 extracellular side, respectively.  $k_i$  is the rate constant associated with each ion-  
230 permeation step labeled on each reaction shown in Fig. 2. Note that the reaction rate is  
231 simply the current  $I$ , thus  $I = k_2[ES] - k_{-2}[E][P]$  and  $I = -(k_{-1}[ES] - k_1[E][S])$  for the  
232 first and second mechanism, respectively. Now, let  $E_t = [E] + [ES]$ , we obtain a  
233 general equation for the two-state model:

$$234 \quad I = \frac{E_a \cdot \left(1 + K_1 \frac{[E]}{[ES]}\right)}{1 + \frac{[E]}{[ES]}} \quad (1)$$

235 In the first mechanism,  $E_a = k_2 \cdot E_t$  and  $K_1 = -k_{-2} \cdot [P]/k_2$ . And in the second  
236 mechanism,  $E_a = -k_{-1} \cdot E_t$  and  $K_1 = -k_1 \cdot [S]/k_{-1}$ . Note that the expressions of  $E_a$  and  $K_1$   
237 need not be identified at the stage of data fitting that each of them can be considered  
238 simply as one parameter of Eq. (1). After fitting the curve, their expressions can be  
239 used to explain and compare the channel functions.

240 The next step is to relate the concentration ratio  $[E]/[ES]$  to the test voltage  $V$ .  
241 Hodgkin and Huxley used the open probability theory (Hodgkin & Huxley, 1952),  
242 here we use the principles of chemical potentials that enable us to express all the  
243 relevant concentration ratios of the different states, such as  $[ES]/[E]$ ,  $[FT]/[E]$ ,  
244  $[EST]/[ES]$ , etc. According to the thermodynamic principles, at equilibrium, the  
245 chemical potentials of the E, S, and ES in the first step of mechanism m2A have the  
246 relation:  $\mu_E + \mu_S = \mu_{ES}$ . Now express each  $\mu$  using the thermodynamic principle:

$$247 \quad \begin{aligned} &\mu_E^\circ + k_B T \ln[E] + q_E V + \mu_S^\circ + k_B T \ln[S] + q_S V \\ &= \mu_{ES}^\circ + k_B T \ln[ES] + q_{ES} V \end{aligned} \quad (2)$$

248 Here  $\mu_i^\circ$  denotes the chemical potential of each species  $i$  under the standard state,  
249  $V$  is the electrostatic potential (it is the membrane potential in the ion-channel

250 studies),  $q_i$  is the electric charge of each species  $i$ ,  $k_B$  is Boltzmann's constant, and  $T$  is  
251 the absolute temperature. Rearranging this equation, we obtain:

$$252 \quad \frac{[E][S]}{[ES]} = e^{-\Delta\mu^\circ/k_B T} e^{-q_1 V/k_B T} \quad (3)$$

253 Here  $q_1 = q_E + q_S - q_{ES}$ , which represents the change of the electric charge before  
254 and after the ion binding to the protein.  $\Delta\mu^\circ = \mu_E^\circ + \mu_S^\circ - \mu_{ES}^\circ$ . Define that  $[E] = [ES]$   
255 when  $V = E_1$  ( $E_1$  is the half-activation potential, conventionally denoted as  $V_{1/2}$ ,  
256 representing the voltage at which half channels are in the E state and the other half are  
257 in the ES state), and  $\Delta\mu^\circ$  can be expressed as a function of  $E_1$ :  $e^{-\Delta\mu^\circ/k_B T} = [S]e^{q_1 E_1/k_B T}$ .  
258 Inserting this into Eq. (3), and assuming that the solutions contain the abundant  
259 permeant ions (so that the ion concentrations change little at  $V$  and  $E_1$ ), we obtain:

$$260 \quad \frac{[E]}{[ES]} = e^{-q_1(V-E_1)/k_B T} \quad (4)$$

261 Eq. (4) is analogous to the results obtained by the probability theory (Hodgkin &  
262 Huxley, 1952), except that  $q_1$  has a slightly different meaning than the one shown in  
263 the original Boltzmann equation, here it describes the change of the charges of the  
264 ion-protein complex. Because proteins contain the charges, dipoles, quadruples, etc.,  
265 and their values may also change during the ion-binding process, so the value of  $q_1$   
266 need not be integers any more, which is often found in real cases. Normally, a large  $q_1$   
267 value can be interpreted as a large number of ions binding to the channel. With this  
268 definition of  $q_1$ , the "ion-unbound" state can still have ions bound inside the channel,  
269 and this was confirmed by many structural studies that the closed state channels  
270 bound ions inside their selectivity filters (Doyle et al., 1998; Hite et al., 2015; Tao,  
271 Avalos, Chen, & MacKinnon, 2009). Here  $q_1$  shows only the electric charges altered  
272 in the ion-protein complex in the "ion-bound" state relative to that in the "ion-

273 unbound” state. And this is why sometimes the calculated  $q_1$  value is small that is  
274 hardly explained by the charges carried by ions. Here, the “ion-unbound” state is  
275 merely a name representing one channel state, which may not be the ion-depleted  
276 state in reality. However, for the sake of clarity, we still use the ion-depleted structure  
277 to denote the “ion-unbound” state in Figs. 2 and 3.

278 Performing the similar analysis for the mechanism m2B, we obtain the general  
279 formula for the two-state model that relates the current  $I$  to the test voltage  $V$ :

$$280 \quad I = \frac{Ea \cdot \left(1 + K_1 e^{-q_1(V-E_1)/k_B T}\right)}{1 + e^{-q_1(V-E_1)/k_B T}} \quad (5)$$

281 When using the normalized current and when  $K_1 = 0$ , Eq. (5) reduces to the  
282 Boltzmann equation. Apparently, the Boltzmann equation is only a limiting case of  
283 the two-state model presented by Eq. (5), which occurs when the channel conducts  
284 ions in only one direction.

### 285 **B. The three-state model**

286 Many mechanisms exist for the three-state model. We select three groups of  
287 mechanisms (Fig. 3) that are likely employed in real problems because they can  
288 describe all curves shown in Fig. 1. We find that the mechanisms in the first group are  
289 especially useful where the channel has one ion-unbound state E and two ion-bound  
290 states ES and FT (see Fig. 3). Here ES and FT can represent the channel having the  
291 different abilities to conduct ions in the inward and outward directions that results in  
292 rectifications (Fig. 1 B1, B2, C1-C3); or they can represent the channel having the  
293 different abilities to conduct ions in one direction that results in multistage  
294 permeations (Fig. 1 E1-E3); or one of them can represent the inactivation state (bound  
295 with ions but not transmitting them) that results in the conditional inactivation curves  
296 identified by a noticeable bell shape (Fig. 1 D1-D3). Mechanisms in the second group

297 contain two ion-unbound states E and F, and one ion-bound state ES. Here E and F  
298 can represent the different rest-state channels having the different propensities to bind  
299 ions competing for the same conductive conformation of the channel, which can  
300 include the multistage permeation process; or one of them can represent the  
301 inactivation state that results in the conditional inactivation curves. Mechanisms in the  
302 third group contain one ion-unbound state E and two ion-bound states ES and EST,  
303 where the EST state represents the channel binding ions S and T. Mechanisms in the  
304 third group are most suitable for describing the multistage permeation process, but  
305 they are not limited to this case, e.g., ES or EST can also represent the inactivation  
306 state that results in the bell-shaped inactivation curves. Therefore, multiple  
307 mechanisms can lead to the same current-voltage curve. We may select the one that  
308 reasonably explains the ion permeation data consistent with the experimental design  
309 meanwhile yielding the smallest error in fitting the curve.

310 Although the mechanisms vary from one another, they all reduce to the same  
311 working equation if using the universal parameters  $E_a$ ,  $K_1$ , and  $K_2$  (their expressions  
312 for the individual mechanisms are listed in Appendix A):

$$313 \quad I = \frac{E_a \cdot \left( 1 + K_1 e^{-q_1(V-E_1)/k_B T} + K_2 e^{-q_2(V-E_2)/k_B T} \right)}{1 + e^{-q_1(V-E_1)/k_B T} + e^{-q_2(V-E_2)/k_B T}} \quad (6)$$

314 Here  $q_1$ ,  $q_2$ ,  $E_1$ , and  $E_2$  have similar meanings as those described for the two-state  
315 model (see Appendix A for the definitions of  $q_1$  and  $q_2$  for each mechanism).  $E_a$ ,  $K_1$ ,  
316 and  $K_2$  have different expressions for each mechanism (Appendix A), but they need  
317 not be identified at the stage of the data fitting. This means that we can fit the data  
318 simply using Eq. (6), then find the most suitable mechanism based on the parameters.  
319 Alternatively, we can choose several mechanisms and fit the data using their specific  
320 equations determined by the expressions of  $E_a$ ,  $K_1$ , and  $K_2$  (Appendix A), then select



321 the mechanism that yields the smallest error in fitting the data. Note that when  
322 comparing the conduction rates described by the same mechanism, we can directly  
323 use the values of  $E_a \cdot K_1$  and  $E_a \cdot K_2$ . For example, in the mechanism m3A2,  $E_a \cdot K_1 =$   
324  $k_2 \cdot Et$  and  $E_a \cdot K_2 = -k_3 \cdot Et$ , thus comparing the absolute values of  $E_a \cdot K_1$  and  $E_a \cdot K_2$  is  
325 similar to comparing  $k_2$  and  $k_3$  if  $Et$  is kept constant.

326 Eq. (6) is a universal working equation of the three-state model for fitting the  
327 data. Can there be a universal mechanism of the three-state model for explaining the  
328 data? Among the twelve mechanisms we have proposed (Fig. 3), we find that  
329 mechanisms m3A2 and m3A3, differing in the permeation directions, are especially  
330 useful that they describe most of the current-voltage curves appearing at different  
331 circumstances. Indeed, all curves in Fig. 1 were drawn using these two mechanisms.  
332 These curves vary from the simplest ohmic behavior (Fig. 1 A1), to the inward and  
333 outward rectifications (Fig. 1 B1, B2, C1-C3), inactivation (Fig. 1 D1-D3), and even  
334 the multistage permeations (Fig. 1 E1-E3). Employing the same mechanism enables  
335 us to compare the model parameters directly that immediately explains the altered  
336 channel functions. For example, the outward rectification curves C1 and C2 look  
337 different (Fig. 1), but they differ only in the half-activation potentials ( $E_1 = 50$  mV,  $E_2$   
338  $= -150$  mV in C1 curve, and  $E_1 = 100$  mV,  $E_2 = -200$  mV in C2 curve). They look  
339 different simply because the voltage is restricted to below 100 mV. Besides the shift  
340 in the half-activation potentials, changes in  $q$  may also contribute to the rectification  
341 behavior within a restricted voltage range, e.g., the curve C2 itself is due to a larger  
342 number of ions binding to the channel at the intracellular side relative to that at the  
343 extracellular side ( $q_1 = -1.5$  e,  $q_2 = 0.3$  e), accompanied by the shift in the half-  
344 activation potentials ( $E_1 = 100$  mV,  $E_2 = -200$  mV). In addition, a large difference in  
345  $K_1$  and  $K_2$  can also result in rectifications, e.g., the inward rectification curve B2 is

346 due to a larger inward conduction rate relative to the outward conduction rate ( $K_2 =$   
347 12,  $K_1 = 1$ ). Thus, comparing model parameters enables us to compare the channel  
348 functions directly.

349 Note that Eq. (6) is not limited to describing the mechanisms shown in Fig. 3, it  
350 can also describe other mechanisms employing three channel states, including the  
351 previously published three-state model (Lacroix et al., 2012) (see Appendix B).  
352 Therefore, Eq. (6) is a more general form of the three-state model.

### 353 C. The generalized kinetic model (with $N$ states)

354 If the current curves show apparently two or more intermediate states, then the  
355 higher rank model should be used. Generally, the multi-state kinetic model can be  
356 expressed as:

$$357 \quad I = \frac{Ea \cdot \left( 1 + \sum_{i=1}^{N-1} K_i e^{-q_i(V-E_i)/k_B T} \right)}{1 + \sum_{i=1}^{N-1} e^{-q_i(V-E_i)/k_B T}} \quad (7)$$

358 Here the parameters  $q_i$  and  $E_i$  are the electric charge changed (relative to the  
359 reference state) and the half-activation potential associated with each state  $i$  relative to  
360 the reference state defined for each mechanism (e.g., E state is the reference state in  
361 mechanism m3A2), and their meanings are explained analogously to those of the two-  
362 and three-state models. Like the two- and three-state models, the  $N$ -state model  
363 contains multiple mechanisms, and the values of  $Ea$  and  $K_i$  depend on the individual  
364 mechanisms.

365 When employing four states, Eq. (7) can include the sequential Boltzmann  
366 equations (adding up two Boltzmann equations of the different parameters) (Bezanilla  
367 et al., 1994), and their relations are presented in Appendix C. Note that in some  
368 circumstances, the four channel states can be regrouped into three states that also  
369 reasonably explains the ion-permeation data (Appendix C). Indeed, Bezanilla et al.

370 found that the curves fitted by the sequential Boltzmann equations and the three-state  
371 model were indistinguishable in their case (Bezanilla et al., 1994), confirming that  
372 two or more states can be combined into one state if not incurring the appreciable  
373 current changes.

374

## 375 **Discussion**

376 How does this model work in reality? Here we show several examples using the  
377 published patch-clamp data. The fitted curves are shown in Fig. 4 and the model  
378 parameters are shown in Table 1.

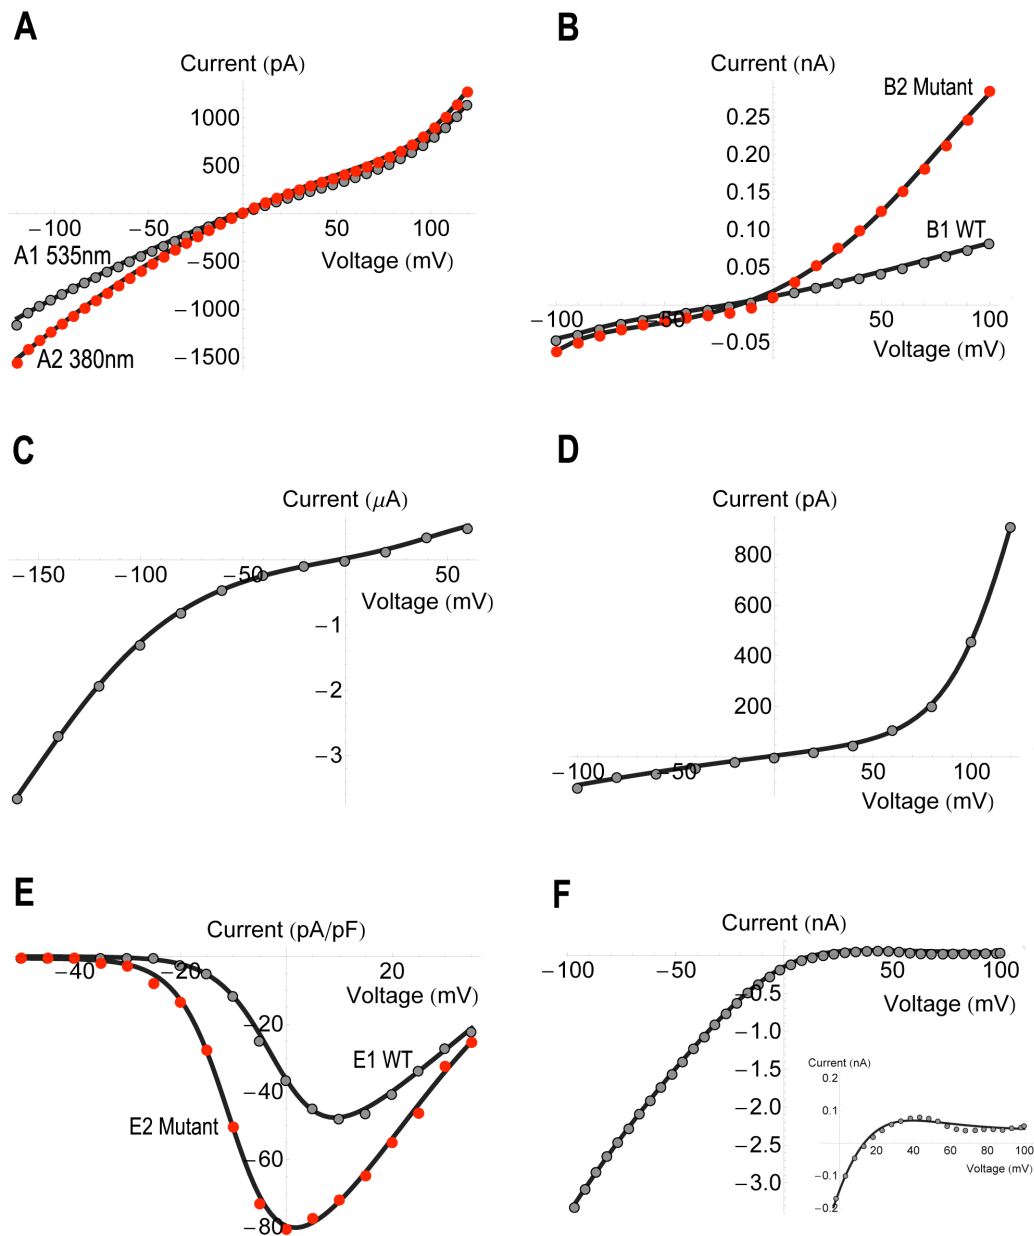

379

380 *Figure 4.*

381 *Experimental current-voltage curves fitted by the three-state model. Source data are*

382 *represented by the filled circles, and the model data are plotted by the solid black*

383 *curves. Reference to the source data, the selected mechanism, and the fitted*

384 *parameters are listed in Table 1. The room temperature (22°C) was used for all*

385 *curve-fitting procedures. The inset in Panel F shows the enlarged plot of a local*  
 386 *region (positive voltages) of the current-voltage curve.*

387

388 Table 1. Three-state model parameters selected for the current-voltage curves shown  
 389 in Fig. 4.

| Curves <sup>a</sup><br>in Fig. | $q_1$ (e) | $q_2$ (e) | $E_1$ (mV) | $E_2$ (mV) | $K_1$ <sup>b</sup> | $K_2$ <sup>b</sup> | $Ea$ <sup>c</sup> | $k'_1$ <sup>d</sup> | $k'_2$ <sup>e</sup> | $\sigma$ <sup>f</sup> | Ref. <sup>g</sup> |
|--------------------------------|-----------|-----------|------------|------------|--------------------|--------------------|-------------------|---------------------|---------------------|-----------------------|-------------------|
| 4A1                            | -1.32     | 0.25      | 135        | -143       | 2.802              | -3.994             | 903 pA            | 2530.206            | 3606.582            | 0.00868               | 1                 |
| 4A2                            | -1.9      | 0.25      | 120        | -165       | 1.684              | -4.996             | 1128 pA           | 1899.552            | 5635.488            | 0.00675               | 1                 |
| 4B1*                           | 2.227     | -0.349    | -90.652    | 81.927     | 1.228              | -4.116             | -0.044 nA         | 0.054               | 0.181               | 0.00902               | 2                 |
| 4B2*                           | 2.03      | -0.66     | -128.719   | 78         | 7.682              | -11.364            | -0.0408 nA        | 0.313               | 0.464               | 0.0132                | 2                 |
| 4C                             | -1.25     | 0.67      | 46         | -154.597   | 11.494             | -102.241           | 0.0666 $\mu$ A    | 0.766               | 6.809               | 0.00628               | 3                 |
| 4D                             | -1.361    | 0.211     | 125.366    | -192.844   | 16                 | -4.795             | 132.217 pA        | 2115.472            | 633.981             | 0.00532               | 4                 |
| 4E1*                           | 4.74      | -0.88     | 0          | 30         | 0                  | -0.46              | -102.422 pA/pF    | 0                   | 47.114              | 0.0138                | 5                 |
| 4E2*                           | 5.11      | -1.68     | -9.562     | 21         | 0.00466            | -0.0879            | -113.74 pA/pF     | 0.53                | 9.998               | 0.0144                | 5                 |
| 4F                             | -1.355    | 0.26      | -2.41      | -246.583   | 0.0222             | -14.901            | 1.799 nA          | 0.0399              | 26.807              | 0.00271               | 6                 |

390

391 <sup>a</sup> Mechanism m3A3 was employed for the curves labeled with an asterisk, and  
 392 mechanism m3A2 was used for all other curves.

393 <sup>b</sup>  $K_1$  and  $K_2$  are dimensionless.

394 <sup>c</sup>  $Ea$  has the same unit as the current reported in the source data file, which is also  
 395 written following each  $Ea$  value in the table.

396 <sup>d</sup>  $k'_1 = Et \cdot k_2 = |Ea \cdot K_1|$  for mechanism m3A2, and  $k'_1 = Et \cdot k_{-1} = |Ea \cdot K_1|$  for mechanism  
 397 m3A3.  $k'_1$  has the same unit as  $Ea$ .

398 <sup>e</sup>  $k'_2 = Et \cdot k_{-3} = |Ea \cdot K_2|$  for mechanism m3A2, and  $k'_2 = Et \cdot k_4 = |Ea \cdot K_2|$  for mechanism  
 399 m3A3.  $k'_2$  has the same unit as  $Ea$ .

400 <sup>f</sup> See Materials and Methods for the definition of  $\sigma$ .

401 <sup>g</sup> Ref. 1 (Lemoine et al., 2020); Ref. 2 (Zheng et al., 2020); Ref. 3 (Chiasson et al.,  
 402 2017); Ref. 4 (Syrjanen et al., 2020); Ref. 5 (Huang et al., 2019); Ref. 6 (Zhou et al.,  
 403 2017).

404

## 405 Two-direction permeation curves

406 Lemoine et al. have designed an optical molecule attached close to the pore of the  
 407 GluD2 receptor that senses the light of the specific wavelength to occlude or open the  
 408 entrance to the channel pore (Lemoine et al., 2020). The two current curves under the

409 535 nm and 380 nm light illuminations (source data from Figure 4A of Ref. (Lemoine  
410 et al., 2020)) were fitted with the three-state model and presented in Fig. 4A.  
411 Mechanism m3A2 is suitable to explain these curves. It describes the two-direction  
412 ion permeations via the two ion-bound states ES and FT. Here ES represents the  
413 channel state inclined to direct the outward current, and FT represents the channel  
414 state inclined to direct the inward current. Compared with the 535 nm light  
415 illumination, the 380 nm light increases the inward conduction rate ( $k'_{2, 535\text{nm}} =$   
416  $3606.58$  pA,  $k'_{2, 380\text{nm}} = 5635.49$  pA, see captions of Table 1 for the definition of  $k'$ )  
417 and decreases the outward conduction rate ( $k'_{1, 535\text{nm}} = 2530.21$  pA,  $k'_{1, 380\text{nm}} = 1899.55$   
418 pA), assuming that Et is unchanged. This produces the increased inward current at  
419 negative potentials, reflecting the optical molecule's ability to sense the specific light  
420 and magnify the inward current. We also note that it modifies the ion binding at the  
421 intracellular side ( $q_{1, 535\text{nm}} = -1.32$  e,  $q_{1, 380\text{nm}} = -1.9$  e) that more ions bind to the  
422 channel under the 380 nm light illumination (when the optical molecule switches to  
423 the cis-conformation that opens the pore entrance), consistent with the lock property  
424 of the optical molecule. In addition, the guanidinium moiety of the optical molecule  
425 may also play a role to bring about these changes, possibly through interacting with  
426 the positively charged ions upon switching its locations under the different light  
427 illuminations.

428 Zheng et al. solved the cryo-EM structures of a eukaryotic cyclic nucleotide-  
429 gated channel TAX-4, and found that the double mutations of the hydrophobic  
430 residues F403V and V407A in the cavity of the channel can increase the outward  
431 basal current (Zheng et al., 2020). The current curves of the wild-type and mutant  
432 channels (source data from Figure 4a in Ref. (Zheng et al., 2020)) were fitted with the  
433 three-state model and plotted in Fig. 4B. Mechanism m3A3 is suitable for this case,

434 where the ES and FT states describe the channel abilities for the inward and outward  
435 conductions, respectively. The cryo-EM structures reveal that F403 and V407 form  
436 the hydrophobic gate inside the channel cavity that they block the permeation  
437 pathway during the closed state but pave the way for ion permeation by rotating aside  
438 upon switching to the open state (Zheng et al., 2020). Mutations to valine and alanine  
439 certainly increase the central space in the cavity that makes the channel a bit “leaky”  
440 in a sense (Zheng et al., 2020). Comparing the model parameters, the mutations  
441 increase the conduction rates in both directions ( $k'_{1, wt} = 0.054$  nA,  $k'_{1, mutant} = 0.31$  nA,  
442 and  $k'_{2, wt} = 0.18$  nA,  $k'_{2, mutant} = 0.46$  nA), conforming the “leaky” property of the  
443 mutant channel. In addition, ion binding at the intracellular side is roughly doubled  
444 ( $q_{2, wt} = -0.35$  e,  $q_{2, mutant} = -0.66$  e), but that of the extracellular side is slightly  
445 decreased ( $q_{1, wt} = 2.23$  e,  $q_{1, mutant} = 2.03$  e), reflecting the increased ability of the  
446 mutant channel for the outward conduction. This, together with the increased  
447 conduction rates in both directions, exhibits the increased outward basal current as the  
448 overall effect.

#### 449 **Rectification curves**

450 Chiasson et al. have reported a *brush* mutation in the cyclic nucleotide-gated  
451 channel that resulted in the gain-of-function, manifested by the inward rectification of  
452 the  $Ca^{2+}$  current (Chiasson et al., 2017). The typical current curve (source data from  
453 the *brush* curve of Figure 3D in Ref. (Chiasson et al., 2017)) was fitted by the three-  
454 state model and plotted in Fig. 4C. Employing mechanism m3A2, the inward  
455 rectification is mainly due to the larger inward conduction rate ( $K_2 = -102.24$ ) relative  
456 to the smaller outward conduction rate ( $K_1 = 11.49$ ).

457 Syrjanen et al. have reported the structure of a calcium homeostasis modulator  
458 that produced the outward-rectification current (Syrjanen et al., 2020). The typical

459 current curve (source data from the hCALHM1 curve of Figure 1b in Ref. (Syrjanen  
460 et al., 2020)) was fitted by the three-state model (mechanism m3A2) and plotted in  
461 Fig. 4D. This time, the outward rectification is due to the larger number of ions  
462 binding at the intracellular side ( $q_1 = -1.36 e$ ,  $q_2 = 0.21 e$ ), and a larger outward  
463 conduction rate ( $K_1 = 16$ ,  $K_2 = -4.8$ ).

464 The above results, together with the model curves shown in Fig. 1, show the  
465 varied reasons that lead to the rectifications. Theoretically, a large difference in  $K_1$   
466 and  $K_2$  can lead to rectifications. But these rectifications may not appear within the  
467 restricted voltage range selected for the current recordings. Thus the rectification  
468 curve shown up in a narrowed voltage range is usually due to a collective action  
469 mixed with the individual changes in  $q$ ,  $E$ , and  $K$ . Simply comparing  $q_1$  and  $q_2$  or  
470 comparing  $K_1$  and  $K_2$  sometimes can lead to inconsistent conclusions, e.g., in Fig. 4C,  
471 a larger  $q_1$  compared to  $q_2$  ( $q_1 = -1.25 e$ ,  $q_2 = 0.67 e$ ) does not lead to the conclusion of  
472 the outward rectification.

### 473 **Bell-shaped curves**

474 Huang et al. have reported a mutation of the voltage-gated calcium channel that  
475 resulted in the gain-of-function and produced the increased inward current (Huang et  
476 al., 2019). The current curves of the wild-type and mutant channels (source data from  
477 Figure 3b of Ref. (Huang et al., 2019)) were plotted in Fig. 4E. We find that the  
478 mechanism m3A3 is suitable to explain these curves. Here ES represents the  
479 inactivation channel state at the negative potentials. Note that the “inactivation state”  
480 used here is only a general term denoting one nonconducting channel state, which can  
481 result from several conditions including the closing of the inner gate. As the test  
482 voltage increases, the channel gradually recovers from the inactivation state and  
483 switches to the E state then to the FT state, which is accompanied by the inward



484 conduction of ions at the less negative to the small positive potentials. At the more  
485 positive potentials, the FT state dominates that directs the outward current. This is  
486 how the bell-shape curve is formed around 0 mV. Comparing the parameters of the  
487 wild-type and mutant channel curves, the mutation increases both outside and inside  
488 ion binding ( $q_{1, wt} = 4.74 e$ ,  $q_{1, mutant} = 5.11 e$ ;  $q_{2, wt} = -0.88 e$ ,  $q_{2, mutant} = -1.68 e$ ), shifts  
489 both half-activation potentials to the left ( $E_{1, wt} = 0$  mV,  $E_{1, mutant} = -9.56$  mV;  $E_{2, wt} =$   
490  $30$  mV,  $E_{2, mutant} = 21$  mV), and significantly decreases the outward ion-conduction  
491 rate ( $k'_{2, wt} = 47.11$  pA/pF,  $k'_{2, mutant} = 10$  pA/pF). These changes lead to the larger  
492 inward current shifted to the left of the wild-type current curve (Fig. 4E), which can  
493 be interpreted as the gain-of-function.

494 Zhou et al. have solved the cryo-EM structures of the human endolysosomal  
495 TRPML3 channel and studied its functions (Zhou et al., 2017). The ligand-activated  
496 current curve of the wild-type channel (source data from the ML-SA1 ligand-bound  
497 current curve in Figure 2b of Ref. (Zhou et al., 2017)) showed not only an inward  
498 rectification, but also a bell curvature at positive potentials (Fig. 4F, the inset shows  
499 the enlarged plot of the current at positive potentials). We can use the mechanism  
500 m3A2 to explain this phenomenon. At negative potentials, the FT state is the active  
501 form that directs the large inward currents ( $K_2 = -14.9$ ). As the test voltage increases,  
502 the ion permeation changes the direction, and the FT state gradually switches to the E  
503 then to the ES state. The ES state is the inactivation state because the channel nearly  
504 prohibits ion conduction at the very positive potentials ( $K_1 = 0.022$ ).

### 505 **Some further points**

506 The above studies show only the applicability of the three-state model, that it can  
507 fit the curve and explain their mechanisms in accordance with the experimental  
508 findings. But they tell nothing about the reliability of the model parameters, because

509 only one curve (the averaged data in most cases) is used for each case in our study.  
510 The reliability of the model parameters depends on the reproducibility of each data  
511 set, and hence is beyond the scope of this paper. However, the model parameters do  
512 provide a way to examine the reproduced data sets (by comparing the model  
513 parameters obtained from fitting the curve using each data set) and check whether  
514 these data values are consistent with one another.

515 Many patch-clamp recordings show the continuously increasing currents not  
516 reaching the saturation level, and we may wonder when the current will saturate. This  
517 information is easily obtained from the three-state model if the parameters are  
518 reliable. For example, in mechanism m3A2, the saturation currents are  $Ea \cdot K_1$  and  
519  $Ea \cdot K_2$  at the positive and negative potentials, respectively. The saturation currents can  
520 occur within or beyond the physiological recording range, and the model can help  
521 predict these values or help record these values based on the predicted voltage range.

522 Do the above analyses confirm that the channels switch among only three  
523 possible states in those ion-permeation processes? No, the model only suggests that  
524 each permeation event employs only three major channel states, that the currents  
525 elicited from the minor states are either too small to be detected or merged into the  
526 major states during the concerted movements. Employing more states certainly is  
527 possible, but not suggested because extra parameters can incur large inaccuracies if  
528 not supported by the enhanced recordings that yield adequate curvatures in the  
529 current-voltage curves to discriminate the intermediate states. However, these  
530 analyses do suggest a simplified but universal mechanism, sufficient to explain most  
531 ion-permeation events with only three major channel states. The essential feature of  
532 this mechanism is the voltage-dependent switch between the two ion-bound states ES  
533 and FT, reflecting channel's altered abilities to conduct ions in the uni- or opposite

534 directions. In fact, their presumable equivalents are already found in the structural  
 535 studies. Cuello et al. have reported a series of the crystal structures of the KcsA K<sup>+</sup>  
 536 channel (Cuello et al., 2010), differing in the opening scale at the intracellular gate,  
 537 some even accompanied by the structural change in the selectivity filter, that any of  
 538 these structures may represent the ES or FT state with the altered abilities to conduct  
 539 ions.

540

## 541 Appendices

### 542 Appendix A: Parameters of the three-state model

543 The four mechanisms in group A employ the concentration ratios [ES]/[E] and  
 544 [FT]/[E]. Following similar analyses using the thermodynamic principles (as those  
 545 used in deriving Eq. (4)), we obtain:  $[ES]/[E] = e^{-q_1(V-E_1)/k_B T}$  and  $[FT]/[E] = e^{-q_2(V-E_2)/k_B T}$ .  
 546 Here  $q_1 = q_{ES} - q_E - q_S$  for mechanisms m3A1 and m3A2, and  $q_1 = q_{ES} - q_E - q_P$  for  
 547 mechanisms m3A3 and m3A4.  $q_2 = q_{FT} - q_E - q_T$  for mechanisms m3A1 and m3A3,  
 548 and  $q_2 = q_{FT} - q_E - q_Q$  for mechanisms m3A2 and m3A4.  $E_1$  and  $E_2$  are the half-  
 549 activation potentials associated with the portion of the channels changing from the E  
 550 state to the ES and FT states, respectively. The expressions of  $E_a$ ,  $K_1$ , and  $K_2$  for the  
 551 individual mechanisms of this group are:

$$552 \quad \text{m3A1: } E_a = -(k_{-2} \cdot [P] + k_{-4} \cdot [Q]) \cdot E_t \quad \begin{aligned} K_1 &= -k_2 / (k_{-2} \cdot [P] + k_{-4} \cdot [Q]) \\ K_2 &= -k_4 / (k_{-2} \cdot [P] + k_{-4} \cdot [Q]) \end{aligned}$$

$$553 \quad \text{m3A2: } E_a = (k_3 \cdot [T] - k_{-2} \cdot [P]) \cdot E_t \quad \begin{aligned} K_1 &= +k_2 / (k_3 \cdot [T] - k_{-2} \cdot [P]) \\ K_2 &= -k_{-3} / (k_3 \cdot [T] - k_{-2} \cdot [P]) \end{aligned}$$

$$554 \quad \text{m3A3: } E_a = -(k_{-4} \cdot [Q] - k_1 \cdot [S]) \cdot E_t \quad \begin{aligned} K_1 &= +k_{-1} / (k_{-4} \cdot [Q] - k_1 \cdot [S]) \\ K_2 &= -k_4 / (k_{-4} \cdot [Q] - k_1 \cdot [S]) \end{aligned}$$

$$555 \quad \text{m3A4: } E_a = (k_1 \cdot [S] + k_3 \cdot [T]) \cdot E_t \quad \begin{aligned} K_1 &= -k_{-1} / (k_1 \cdot [S] + k_3 \cdot [T]) \\ K_2 &= -k_{-3} / (k_1 \cdot [S] + k_3 \cdot [T]) \end{aligned}$$

556 The four mechanisms in group B employ the concentration ratios  $[E]/[ES]$  and  
 557  $[F]/[ES]$ . Here  $[E]/[ES] = e^{-q_1(V-E_1)/k_B T}$  and  $[F]/[ES] = e^{-q_2(V-E_2)/k_B T}$ , where  $q_1 = q_E + q_S -$   
 558  $q_{ES}$  for mechanisms m3B1 and m3B2, and  $q_1 = q_E + q_P - q_{ES}$  for mechanisms m3B3  
 559 and m3B4.  $q_2 = q_F + q_T - q_{ES}$  for mechanisms m3B1 and m3B3, and  $q_2 = q_F + q_Q -$   
 560  $q_{ES}$  for mechanisms m3B2 and m3B4.  $E_1$  and  $E_2$  are the half-activation potentials  
 561 associated with the portion of the channels changing from the ES state to the E and F  
 562 states, respectively. The expressions of  $E_a$ ,  $K_1$ , and  $K_2$  for the individual mechanisms  
 563 of this group are:

$$564 \quad \text{m3B1: } E_a = (k_2 + k_4) \cdot E_t \quad \begin{aligned} K_1 &= -k_{-2} \cdot [P] / (k_2 + k_4) \\ K_2 &= -k_{-4} \cdot [Q] / (k_2 + k_4) \end{aligned}$$

$$565 \quad \text{m3B2: } E_a = (k_2 - k_{-3}) \cdot E_t \quad \begin{aligned} K_1 &= -k_{-2} \cdot [P] / (k_2 - k_{-3}) \\ K_2 &= +k_3 \cdot [T] / (k_2 - k_{-3}) \end{aligned}$$

$$566 \quad \text{m3B3: } E_a = -(k_{-1} - k_4) \cdot E_t \quad \begin{aligned} K_1 &= -k_1 \cdot [S] / (k_{-1} - k_4) \\ K_2 &= +k_{-4} \cdot [Q] / (k_{-1} - k_4) \end{aligned}$$

$$567 \quad \text{m3B4: } E_a = -(k_{-1} + k_{-3}) \cdot E_t \quad \begin{aligned} K_1 &= -k_1 \cdot [S] / (k_{-1} + k_{-3}) \\ K_2 &= -k_3 \cdot [T] / (k_{-1} + k_{-3}) \end{aligned}$$

568 The four mechanisms in group C employ the concentration ratios  $[E]/[ES]$  and  
 569  $[EST]/[ES]$ . Here  $[E]/[ES] = e^{-q_1(V-E_1)/k_B T}$  and  $[EST]/[ES] = e^{-q_2(V-E_2)/k_B T}$ , where  $q_1 = q_E$   
 570  $+ q_S - q_{ES}$  for mechanisms m3C1 and m3C2, and  $q_1 = q_E + q_P - q_{ES}$  for mechanisms  
 571 m3C3 and m3C4.  $q_2 = q_{EST} - q_{ES} - q_T$  for mechanisms m3C1 and m3C3, and  $q_2 = q_{EST}$   
 572  $- q_{ES} - q_Q$  for mechanisms m3C2 and m3C4.  $E_1$  and  $E_2$  are the half-activation  
 573 potentials associated with the portion of the channels changing from the ES state to

574 the E and EST states, respectively. The expressions of  $E_a$ ,  $K_1$ , and  $K_2$  for the  
 575 individual mechanisms of this group are:

$$576 \quad \text{m3C1: } E_a = (k_2 - k_{-4} \cdot [Q]) \cdot E_t \quad \begin{array}{l} K_1 = -k_{-2} \cdot [P] / (k_2 - k_{-4} \cdot [Q]) \\ K_2 = +k_4 / (k_2 - k_{-4} \cdot [Q]) \end{array}$$

$$577 \quad \text{m3C2: } E_a = (k_2 + k_3 \cdot [T]) \cdot E_t \quad \begin{array}{l} K_1 = -k_{-2} \cdot [P] / (k_2 + k_3 \cdot [T]) \\ K_2 = -k_{-3} / (k_2 + k_3 \cdot [T]) \end{array}$$

$$578 \quad \text{m3C3: } E_a = -(k_{-1} + k_{-4} \cdot [Q]) \cdot E_t \quad \begin{array}{l} K_1 = -k_1 \cdot [S] / (k_{-1} + k_{-4} \cdot [Q]) \\ K_2 = -k_4 / (k_{-1} + k_{-4} \cdot [Q]) \end{array}$$

$$579 \quad \text{m3C4: } E_a = -(k_{-1} - k_3 \cdot [T]) \cdot E_t \quad \begin{array}{l} K_1 = -k_1 \cdot [S] / (k_{-1} - k_3 \cdot [T]) \\ K_2 = +k_{-3} / (k_{-1} - k_3 \cdot [T]) \end{array}$$

580

## 581 **Appendix B: Relation of the three-state models**

582 Lacroix et al. developed a three-state model suitable to calculate the multistage  
 583 gating charge as a function of the test voltage (Lacroix et al., 2012). The gating  
 584 charge per voltage-sensing domain is defined as:

$$585 \quad Q_g = \frac{q_2' + q_1' \left(1 + e^{-q_2'(V-E_2)/k_B T}\right)}{1 + e^{-q_2'(V-E_2)/k_B T} \cdot \left(1 + e^{-q_1'(V-E_1)/k_B T}\right)} = \frac{q_1' + (q_1' + q_2') e^{q_2'(V-E_2)/k_B T}}{1 + e^{-q_1'(V-E_1)/k_B T} + e^{q_2'(V-E_2)/k_B T}} \quad (\text{B1})$$

586 In their definitions,  $q_1'$  is the charge associated with the transition from the  
 587 resting to the intermediate state, and  $q_2'$  is the charge associated with the subsequent  
 588 transition from the intermediate to the active state. Now let's define the total gating  
 589 charge per voltage-sensing domain  $Q_{g,\max} = q_1' + q_2'$ , and the fraction of the charge in  
 590 the intermediate state  $f = q_1' / Q_{g,\max}$ , then we obtain:

$$591 \quad \frac{Q_g}{Q_{g,\max}} = \frac{f \left(1 + \frac{1}{f} e^{q_2'(V-E_2)/k_B T}\right)}{1 + e^{-q_1'(V-E_1)/k_B T} + e^{q_2'(V-E_2)/k_B T}} \quad (\text{B2})$$

592 Now we can relate Eq. (B2) to mechanism m3C1:

$$I = \frac{(k_2 - k_{-4} \cdot [Q]) \cdot E_i \cdot \left( 1 - \frac{k_{-2} \cdot [P]}{k_2 - k_{-4} \cdot [Q]} e^{-q_1(V-E_1)/k_B T} + \frac{k_4}{k_2 - k_{-4} \cdot [Q]} e^{-q_2(V-E_2)/k_B T} \right)}{1 + e^{-q_1(V-E_1)/k_B T} + e^{-q_2(V-E_2)/k_B T}} \quad (\text{B3})$$

594

595 If  $k_{-2} \cdot [P]$  is small enough or  $k_{-2} \cdot [P] \ll k_2 - k_{-4} \cdot [Q]$ , the second term in the  
 596 numerator of Eq. (B3) can be neglected, and we obtain

$$\frac{I}{I_{\max}} = \frac{(k_2 - k_{-4} \cdot [Q])}{k_4} \cdot \left( 1 + \frac{k_4}{k_2 - k_{-4} \cdot [Q]} e^{-q_2(V-E_2)/k_B T} \right) \quad (\text{B4})$$

598 Here  $I_{\max} = k_4 \cdot E_i$ . Comparing Eq. (B4) with Eq. (B2),  $q_1 = q_1'$  and  $q_2 = -q_2'$ ,  
 599 because we have defined the transitions both starting from the intermediate state in  
 600 mechanism m3C1. The fraction of charge  $f$  in Eq. (B2) is equivalent to the fraction of  
 601 the rate constant  $(k_2 - k_{-4} \cdot [Q])/k_4$  in Eq. (B4). Therefore Eq. (B2) can be considered  
 602 as a special case of mechanism m3C1 defined by Eq. (B3) when  $k_{-2} \cdot [P] \approx 0$  or  $k_{-2} \cdot [P]$   
 603  $\ll k_2 - k_{-4} \cdot [Q]$ .

604

### 605 **Appendix C: Relation of the four-state model and the sequential Boltzmann** 606 **equations**

607 The sequential Boltzmann equations proposed by Bezanilla et al. were also used  
 608 to calculate the gating charge of the Shaker channel, that yielded a charge-voltage  
 609 curve identical to that obtained by the three-state model (Bezanilla, Perozo, & Stefani,  
 610 1994). The sequential Boltzmann equations can represent the two independent ion-  
 611 binding processes, that include an intermediate ES state with the fraction of charge  $f =$   
 612  $q_1'/Q_{g,\max}$ , where  $Q_{g,\max} = q_1' + q_2'$ :

$$\begin{aligned}
 \frac{Q_g}{Q_{g,\max}} &= \frac{f}{1 + e^{-q_1'(V-E_1)/k_B T}} + \frac{1-f}{1 + e^{-q_2'(V-E_2)/k_B T}} \\
 613 \quad &= \frac{f \left( 1 + \frac{1-f}{f} \cdot e^{-q_1'(V-E_1)/k_B T} \cdot e^{q_2'(V-E_2)/k_B T} + \frac{1}{f} \cdot e^{q_2'(V-E_2)/k_B T} \right)}{1 + e^{-q_1'(V-E_1)/k_B T} + e^{-q_1'(V-E_1)/k_B T} \cdot e^{q_2'(V-E_2)/k_B T} + e^{q_2'(V-E_2)/k_B T}} \quad (C1)
 \end{aligned}$$

614 And this is equivalent to a four-state model involving the E, ES, FT, and EST  
 615 states. Let's write one simple mechanism for this four-state model:

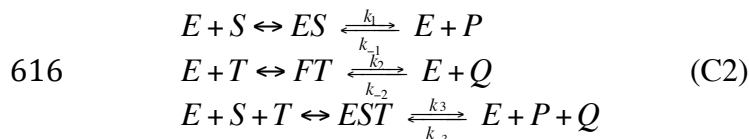

617 If we define  $I_{\max} = k_3 \cdot E_t$ , then the normalized current for this mechanism is:

$$618 \quad \frac{I}{I_{\max}} = \frac{k_1 \left( 1 - \frac{k'}{k_1} e^{-q_1(V-E_1)/k_B T} + \frac{k_2}{k_1} e^{-q_2(V-E_2)/k_B T} + \frac{k_3}{k_1} e^{-q_3(V-E_3)/k_B T} \right)}{1 + e^{-q_1(V-E_1)/k_B T} + e^{-q_2(V-E_2)/k_B T} + e^{-q_3(V-E_3)/k_B T}} \quad (C3)$$

619 Note that Eq. (C3) is only a subset case defined by the generalized kinetic model  
 620 (Eq. (7)) involving four states. Here  $k' = k_{-1} \cdot [P] + k_{-2} \cdot [Q] + k_{-3} \cdot [P] \cdot [Q]$ ,

621  $[E]/[ES] = e^{-q_1(V-E_1)/k_B T}$ ,  $[FT]/[ES] = e^{-q_2(V-E_2)/k_B T}$ , and  $[EST]/[ES] = e^{-q_3(V-E_3)/k_B T}$ . When

622  $k'$  is small enough or  $k' \ll k_1$ , the second term in the numerator can be neglected, and

623 we obtain:

$$624 \quad \frac{I}{I_{\max}} = \frac{k_1 \left( 1 + \frac{k_2}{k_1} e^{-q_2(V-E_2)/k_B T} + \frac{k_3}{k_1} e^{-q_3(V-E_3)/k_B T} \right)}{1 + e^{-q_1(V-E_1)/k_B T} + e^{-q_2(V-E_2)/k_B T} + e^{-q_3(V-E_3)/k_B T}} \quad (C4)$$

625 For the independent binding processes defined by Eq. (C2),

626  $e^{-q_2(V-E_2)/k_B T} = e^{-q_1(V-E_1)/k_B T} \cdot e^{-q_3(V-E_3)/k_B T}$ , inserting this into Eq. (C4), we obtain:

$$627 \quad \frac{I}{I_{\max}} = \frac{k_1 \left( 1 + \frac{k_2}{k_1} e^{-q_1(V-E_1)/k_B T} \cdot e^{-q_3(V-E_3)/k_B T} + \frac{k_3}{k_1} e^{-q_3(V-E_3)/k_B T} \right)}{1 + e^{-q_1(V-E_1)/k_B T} + e^{-q_1(V-E_1)/k_B T} \cdot e^{-q_3(V-E_3)/k_B T} + e^{-q_3(V-E_3)/k_B T}} \quad (C5)$$

628 Now comparing Eq. (C5) with Eq. (C1),  $q_1 = q_1'$ ,  $q_3 = -q_2'$ . The fraction of charge  
629  $f$  at the intermediate state is equivalent to the rate constant ratio  $k_1/k_3$ , and  $(1-f)/f$  is  
630 equivalent to  $(k_2/k_3)/(k_1/k_3) = k_2/k_1$ . So the sequential Boltzmann equations can be  
631 described by the four-state model defined by Eq. (C5), which is a special case of Eq.  
632 (C3) that occurs when  $k' \approx 0$  or  $k' \ll k_1$ . Therefore the sequential Boltzmann  
633 equations can be included in the general kinetic model defined by Eq. (7).

634 Now let's compare Eq. (C1) and Eq. (B2). In Eq. (C1), if the second  
635 term  $(1-f)/f \cdot e^{-q_1(V-E_1)/k_B T} \cdot e^{q_2(V-E_2)/k_B T}$  is much smaller than the other terms in the  
636 numerator, and the third term  $e^{-q_1(V-E_1)/k_B T} \cdot e^{q_2(V-E_2)/k_B T}$  is much smaller than the other  
637 terms in the denominator, they can be neglected from the numerator and denominator,  
638 and hence Eq. (C1) is reduced to Eq. (B2). This is when the three-state model and the  
639 sequential Boltzmann equations yield the indistinguishable charge-voltage curves like  
640 those found by Bezanilla et al. (Bezanilla, Perozo, & Stefani, 1994). Following the  
641 mechanism defined by Eq. (C2), this situation can happen when the FT state is  
642 merged into another ion-bound state, so that the four-state model is readily reduced to  
643 a three-state model involving only the E, ES, and EST states. And this is why we  
644 suggest using the lower-rank model whenever the extra intermediate states cannot be  
645 differentiated by the current-voltage curves.

646

## 647 **Materials and Methods**

648 Source data of the current-voltage curves plotted in Fig. 4 were obtained from the  
649 publications listed in Table 1, which were also cited in the Discussion section. For  
650 most of them, we directly used the source data as presented in the source data file  
651 along with the publications, except for the following data.



652 The source data of the current-voltage curves in Figure 4A of Ref. (Lemoine et al.,  
653 2020) each contained 400 pair of values. We had reduced each data size to 41 and  
654 used them for the curve fitting procedure. The data of the reduced size are presented  
655 in the supplementary table.

656 The source data of Figure 2b in Ref. (Zhou et al., 2017) contained 395 pair of  
657 values, and we had reduced the data size to 41. The data with the reduced size are  
658 presented in the supplementary table.

659 All source data were fitted following the method of the nonlinear least squares.  
660 The model parameters that yielded the smallest  $\sigma$  value were selected, where  $\sigma$  is  
661 defined as:

$$662 \quad \sigma = \sqrt{\frac{\sum_{i=1}^N (m_i - s_i)^2}{N \cdot |s_{\max}|^2}}$$

663 Here  $s_i$  represents the  $i$ -th current value in the source data of size  $N$ .  $m_i$  represents  
664 the  $i$ -th current value calculated by the selected three-state model.  $|s_{\max}|$  is the absolute  
665 value of the maximum current in the source data file. The parameters selected for  
666 each curve, together with the calculated  $\sigma$  value, are presented in Table 1.

667

## 668 **Acknowledgments**

669 I am grateful to the authors of the publications listed in Table 1, who generously  
670 published their source data and shared them with the society, that made the proposed  
671 model testable.

672 This work was supported by Natural Science Foundation of China (Grant No.  
673 21003023).

674

## 675 **Competing Interests**

676 The author declares no competing financial interests.

677

## 678 **References**

- 679 Ackerman, M. J., & Clapham, D. E. (1997). Ion channels—Basic science and  
680 clinical disease. *N Engl J Med*, *336*(22), 1575-1586.
- 681 Ashcroft, F. M. (2006). From molecule to malady. *Nature*, *440*(7083), 440-447.
- 682 Bezanilla, F. (2018). Gating currents. *J Gen Physiol*, *150*(7), 911-932.
- 683 Bezanilla, F., Perozo, E., & Stefani, E. (1994). Gating of Shaker K<sup>+</sup> Channels. 2. The  
684 components of gating currents and a model of channel activation. *Biophys*  
685 *J*, *66*(4), 1011-1021.
- 686 Carvalho-de-Souza, J. L., & Bezanilla, F. (2018). Nonsensing residues in S3-S4  
687 linker's C terminus affect the voltage sensor set point in K<sup>+</sup> channels. *J Gen*  
688 *Physiol*, *150*(2), 307-321.
- 689 Chiasson, D. M., Haage, K., Sollweck, K., Brachmann, A., Dietrich, P., & Parniske, M.  
690 (2017). A quantitative hypermorphic CNGC allele confers ectopic calcium  
691 flux and impairs cellular development. *Elife*, *6*. doi:10.7554/eLife.25012
- 692 Choi, K. L., Aldrich, R. W., & Yellen, G. (1991). Tetraethylammonium blockade  
693 distinguishes two inactivation mechanisms in voltage-activated K<sup>+</sup>  
694 channels. *Proc Natl Acad Sci USA*, *88*(12), 5092-5095.
- 695 Chowdhury, S., & Chanda, B. (2011). Estimating the voltage-dependent free  
696 energy change of ion channels using the median voltage for activation. *J*  
697 *Gen Physiol*, *139*(1), 3-17.
- 698 Chowdhury, S., & Chanda, B. (2012). Free-energy relationships in ion channels  
699 activated by voltage and ligand. *J Gen Physiol*, *141*(1), 11-28.
- 700 Chowdhury, S., Haehnel, B. M., & Chanda, B. (2014). A self-consistent approach  
701 for determining pairwise interactions that underlie channel activation. *J*  
702 *Gen Physiol*, *144*(5), 441-455.
- 703 Cordero-Morales, J. F., Cuello, L. G., Zhao, Y. X., Jogini, V., Cortes, D. M., Roux, B., &  
704 Perozo, E. (2006). Molecular determinants of gating at the potassium-  
705 channel selectivity filter. *Nat Struct Mol Biol*, *13*(4), 311-318.
- 706 Cuello, L. G., Jogini, V., Cortes, D. M., & Perozo, E. (2010). Structural mechanism of  
707 C-type inactivation in K<sup>+</sup> channels. *Nature*, *466*(7303), 203-208.
- 708 Doyle, D. A., Cabral, J. M., Pfuetzner, R. A., Kuo, A. L., Gulbis, J. M., Cohen, S. L., . . .  
709 MacKinnon, R. (1998). The structure of the potassium channel: Molecular  
710 basis of K<sup>+</sup> conduction and selectivity. *Science*, *280*(5360), 69-77.
- 711 Hite, R. K., Yuan, P., Li, Z. L., Hsuing, Y. C., Walz, T., & MacKinnon, R. (2015). Cryo-  
712 electron microscopy structure of the Slo2.2 Na<sup>+</sup>-activated K<sup>+</sup> channel.  
713 *Nature*, *527*(7577), 198-203.
- 714 Hodgkin, A. L., & Huxley, A. F. (1952). A quantitative description of membrane  
715 current and its application to conduction and excitation in nerve. *J Physiol*,  
716 *117*(4), 500-544.
- 717 Horn, R., & Vandenberg, C. A. (1984). Statistical properties of single sodium  
718 channels. *J Gen Physiol*, *84*(4), 505-534.
- 719 Horng, T. L., Eisenberg, R. S., Liu, C., & Bezanilla, F. (2019). Continuum gating  
720 current models computed with consistent interactions. *Biophys J*, *116*(2),  
721 270-282.

- 722 Hoshi, T., Zagotta, W. N., & Aldrich, R. W. (1991). Two types of inactivation in  
723 Shaker K<sup>+</sup> channels: Effects of alterations in the carboxy-terminal region.  
724 *Neuron*, 7(4), 547-556.
- 725 Huang, Y. C., Pirri, J. K., Rayes, D., Gao, S., Mulcahy, B., Grant, J., . . . Alkema, M. J.  
726 (2019). Gain-of-function mutations in the UNC-2/CaV2 $\alpha$  channel lead to  
727 excitation-dominant synaptic transmission in *Caenorhabditis elegans*.  
728 *Elife*, 8. doi:10.7554/eLife.45905
- 729 Islas, L. D., & Sigworth, F. J. (2001). Electrostatics and the gating pore of Shaker  
730 potassium channels. *J Gen Physiol*, 117(1), 69-89.
- 731 Lacroix, J. J., Hyde, H. C., Campos, F. V., & Bezanilla, F. (2014). Moving gating  
732 charges through the gating pore in a Kv channel voltage sensor. *Proc Natl*  
733 *Acad Sci USA*, 111(19), E1950-E1959.
- 734 Lacroix, J. J., Pless, S. A., Maragliano, L., Campos, F. V., Galpin, J. D., Ahern, C. A., . . .  
735 Bezanilla, F. (2012). Intermediate state trapping of a voltage sensor. *J Gen*  
736 *Physiol*, 140(6), 635-652.
- 737 Lehmann-Horn, F., & Jurkat-Rott, K. (1999). Voltage-gated ion channels and  
738 hereditary disease. *Physiol Rev*, 79(4), 1317-1372.
- 739 Lemoine, D., Mondoloni, S., Tange, J., Lambolez, B., Faure, P., Taly, A., . . . Mourot,  
740 A. (2020). Probing the ionotropic activity of glutamate GluD2 receptor in  
741 HEK cells with genetically-engineered photopharmacology. *Elife*, 9.  
742 doi:10.7554/eLife.59026
- 743 Liu, Y., Jurman, M. E., & Yellen, G. (1996). Dynamic rearrangement of the outer  
744 mouth of a K<sup>+</sup> channel during gating. *Neuron*, 16(4), 859-867.
- 745 Matthies, D., Bae, C., Toombes, G. E., Fox, T., Bartesaghi, A., Subramaniam, S., &  
746 Swartz, K. J. (2018). Single-particle cryo-EM structure of a voltage-  
747 activated potassium channel in lipid nanodiscs. *Elife*, 7.  
748 doi:10.7554/eLife.37558
- 749 Neher, E., & Sakmann, B. (1976). Single-channel currents recorded from  
750 membrane of denervated frog muscle fibres. *Nature*, 260(5554), 799-802.
- 751 Neher, E., Sakmann, B., & Steinbach, J. H. (1978). The extracellular patch clamp: a  
752 method for resolving currents through individual open channels in  
753 biological membranes. *Pflugers Arch*, 375(2), 219-228.
- 754 Pau, V., Zhou, Y., Ramu, Y., Xu, Y., & Lu, Z. (2017). Crystal structure of an  
755 inactivated mutant mammalian voltage-gated K<sup>+</sup> channel. *Nat Struct Mol*  
756 *Biol*, 24(10), 857-865.
- 757 Sigg, D. (2014). Modeling ion channels: Past, present, and future. *J Gen Physiol*,  
758 144(1), 7-26.
- 759 Syrjanen, J. L., Michalski, K., Chou, T. H., Grant, T., Rao, S., Simorowski, N., . . .  
760 Furukawa, H. (2020). Structure and assembly of calcium homeostasis  
761 modulator proteins. *Nat Struct Mol Biol*, 27(2), 150-159.
- 762 Tao, X., Avalos, J. L., Chen, J. Y., & MacKinnon, R. (2009). Crystal structure of the  
763 eukaryotic strong inward-rectifier K<sup>+</sup> channel Kir2.2 at 3.1 angstrom  
764 resolution. *Science*, 326(5960), 1668-1674.
- 765 Vandenberg, C. A., & Bezanilla, F. (1991). A sodium channel gating model based  
766 on single channel, macroscopic ionic, and gating currents in the squid  
767 giant axon. *Biophys J*, 60(6), 1511-1533.
- 768 Zagotta, W. N., Hoshi, T., & Aldrich, R. W. (1994). Shaker potassium channel  
769 gating. 3. Evaluation of kinetic-models for activation. *J Gen Physiol*, 103(2),  
770 321-362.

- 771 Zagotta, W. N., Hoshi, T., Dittman, J., & Aldrich, R. W. (1994). Shaker potassium  
772 channel gating. 2. Transitions in the activation pathway. *J Gen Physiol*,  
773 *103*(2), 279-319.
- 774 Zheng, X., Fu, Z., Su, D., Zhang, Y., Li, M., Pan, Y., . . . Yang, J. (2020). Mechanism of  
775 ligand activation of a eukaryotic cyclic nucleotide-gated channel. *Nat*  
776 *Struct Mol Biol*, *27*(7), 625-634.
- 777 Zhou, X., Li, M., Su, D., Jia, Q., Li, H., Li, X., & Yang, J. (2017). Cryo-EM structures of  
778 the human endolysosomal TRPML3 channel in three distinct states. *Nat*  
779 *Struct Mol Biol*, *24*(12), 1146-1154.
- 780 Zhou, Y. F., Morais-Cabral, J. H., Kaufman, A., & MacKinnon, R. (2001). Chemistry  
781 of ion coordination and hydration revealed by a K<sup>+</sup> channel-Fab complex  
782 at 2.0 angstrom resolution. *Nature*, *414*(6859), 43-48.  
783
